# Supplementary material
Source: PubMed Central journal article supplement (PMC3581959)
Supplement: 1207656110_pnas.201207656SI.pdf [file 1207656110_pnas.201207656SI.pdf]

# Supporting Information

Wood et al. 10.1073/pnas.1207656110

## Description of Sites and Samples That Could Not Be Radiocarbon Dated

Bones from 11 sites were screened for the preservation of collagen. Nine sites yielded no datable bone and are described below. Site locations are given in Fig. S1 and the percentage of nitrogen (%N) contents are given in Fig. S2.

**Cendres, 38°41'N 0°08'E (Teulada-Moraira, Alacant), Elevation 50 m.** Excavations since 1995 have uncovered a rich sequence of Upper Paleolithic deposits (1). Beneath levels containing Gravettian assemblages, a potential initial Upper Paleolithic was uncovered in 2005. We aimed to date this and the overlying initial Gravettian occupation. The surfaces of bones were poorly preserved. Three bones without cut-marks or other evidence of butchery were sampled. All failed the %N screening protocol.

**Mallaetes, 39°00'44"N 0°18'04"W (Barx, Valencia), Elevation 500 m.** Mallaetes contains a small collection of Aurignacian remains, including a massive based point and a lozangic point that are indicative of the Evolved Aurignacian, at the base of an Upper Paleolithic sequence (2). The site was excavated by Pericot and Jordá between 1946 and 1949 and Fortea and Jordá cleaned sections and excavated a small area in 1970 (3). The majority of lithic and bone artifacts were found in the earlier excavations. The chronology of this assemblage is based on a single conventional radiocarbon date on a mixture charcoal and sediment ( $29690 \pm 560$  BP KN-1926,  $36120\text{--}32920$  calBP) from the 1970s excavation (3).

Given the age of Pericot and Jordá's excavation and the low occupation density, only modified remains were sought from the collection held at the Museu de Prehistòria de València. The two bone points, on display, were considered likely to have been conserved, and a third bone point fragment, not on display, was small (<1 g) and consolidated. One cutmarked bone was found, but failed the %N screening test. A second bone passed the %N test, but the single striation was not regarded as a convincing cut mark and was therefore not dated.

**El Niño, 38°33'N 2°4'W (Ayna, Albacete), Elevation 800 m.** Initially noted for its Upper Paleolithic rock art (4), El Niño was excavated in 1973 (5–7), uncovering a sequence containing a limited assemblage, likely to be Middle Paleolithic, below the lower eboulis (level 6). As part of a project aiming to re-excavate this poorly known Middle Paleolithic site lead by Alejandro García (Universidad de Cantabria), fauna was sampled to provide a first estimate of the age of the deposit. Twenty-three bones were screened for nitrogen content, only two of which showed clear signs of anthropogenic modification. All failed the screening protocol.

**Quebrada, 39°44'51"N 0°59'35"W (Chelva, Valencia).** Excavations since 2006 at the rock shelter of Quebrada have uncovered layers containing Mousterian assemblages (8). Two radiocarbon dates on charcoal suggest that one combustion feature was created just before 42 ka calBP in the uppermost Mousterian level (layer III) ( $40500 \pm 530$  Beta-244003,  $45250\text{--}43450$  calBP:  $43930 \pm 750$  BP Beta-244002, extends beyond limit of calibration curve). Nine bones were sampled from spits (capas) 5 and 2 to test the existing dates. The surface of the bones was too poorly preserved to identify cut-marks and all failed the %N test.

**El Salt, 38°41'13"N 0°30'32"W (Alcoy, Alacant), Elevation 680 m.** El Salt contains a stratified sequence of Middle Paleolithic layers with

a rich material record including large lithic and faunal assemblages and numerous combustion structures constituting a succession of archaeological palimpsest deposits (11–14). In the basal layers (S.U.XI–XII) human occupation was intense, and starts to diminish in S.U.X, currently undergoing excavation. Between VIII and V lithics are scarce, but five Neanderthal teeth were found in layer V. A radiocarbon date on bone found close to these teeth was treated with the ninhydrin method (Table S6). The bone yielded little carbon, and so the date of  $37100 \pm 320$  BP (code unknown,  $42470\text{--}41430$  calBP) may be an underestimate. Taken at face value however, the date suggests that level V was forming shortly before the arrival of anatomically modern humans (AMHs) in northern Iberia.

This study attempted to test the chronology of units VIII to V. Of 40 bones selected with Bertila Galván and Cristo Hernández (Universidad de la Laguna) at El Salt and the Museu Arqueològic Municipal d'Alcoi, eight had a marginal nitrogen content and five, including a Neanderthal tooth, passed the screening test. Radiocarbon pretreatment was attempted on three bones and one tooth, but none yielded enough collagen for dating. Polyvinyl acetate consolidation of the remaining bones, applied at the time of excavation, was suspected after examination under a microscope and FTIR spectroscopy. Regrettably, therefore, no further work was possible on bone.

**Sima de las Palomas, 37°47'59" N 0°53'45" W (Torre Pacheco, Murcia), Elevation 123 m.** Sima de las Palomas is a karstic shaft that was mined in the 19th century. The Upper Cutting, excavated since 1992, contains at least four Neanderthal individuals associated with a Mousterian assemblage, which Walker et al. (9) claimed post-dates the first occurrence of the Aurignacian north of the Ebro. The radiocarbon dates were on burned bone and the U-series dates on bone that had reached equilibrium in uranium uptake, and both sets of dates must be regarded with caution. Given these problems, Walker et al. (10) have expressed concern that the chronology may be inaccurate. To test the age of this deposit a Neanderthal phalange was screened. Sadly, the phalange did not pass the screening test.

**Cueva Bajondillo, 36°37'10" N 4° 29' 33" W, (Torremolinos, Málaga, Andalucía), Elevation 10 m.** Cueva Bajondillo contains one of the few Evolved Aurignacian assemblages (layer 11) in southern Iberia, overlying a sequence of layers containing Middle Paleolithic industries (layers 17–14) (15). Layers 12 and 13 fill a depression in the top of layer 14, and both may contain redeposited material (Zilhão, 2006; see ref. 47). The site was subject to a rapid rescue excavation in 1989, but the standing section has since been extensively studied by Cortés Sánchez (15). Thermoluminescence dates on burnt flint are anonymously young throughout the stratigraphy, and the chronology is based on radiocarbon dates on charcoal/sediment removed from the standing section from levels 14, 13, and 11 (15). Considering their large errors, these dates fall broadly in line with the expected age of the Evolved Aurignacian and place the Middle Paleolithic beyond 42 ka calBP. However, the sample type is far from ideal and this chronology requires testing.

The few bone fragments recovered by Cortés Sánchez (15) from layers 14–11 of the standing section were examined. Fragments were small (maximum dimension < approximately 5 cm) and thin (< approximately 0.5 cm); they were not identifiable to species and were too degraded to preserve signs of anthropogenic modification. Given the extremely low chance of collagen pres-

ervation, the fragments were not screened for %N. The only alternative samples for radiocarbon are marine shells; however, none have been recovered from the standing section from the units of interest. Cortés Sánchez (15) noted that the excavated lithic assemblages from layers 14–11 appear to be mixed, and so these shells samples were not selected for dating.

**Nerja, 36°45'44''N 3°50'42''W (Maro-Nerja, Málaga, Andalucía), Elevation 158 m.** A series of six radiocarbon dates on charcoal from the Gravettian levels 13 and 12 suggest that Nerja contains one of the earliest Gravettian ages in southern Mediterranean Spain (16), with a Bayesian model predicting a start date of 31680–28654 cal BP at 95% significance. To test, and hopefully increase the precision of this boundary, 25 faunal bones from capas XIII, 13, and 12 were selected. Unfortunately, all of these bones contained less than 0.5%N.

**Gorham's Cave, 36°07'N 5°21'W (Gibraltar), Elevation 14 m.** Gorham's cave has been subject to three main excavations: by Waechter [1948–1954 (17, 18)], the Natural History Museum (NHM) [1995–1998 (19)], and the Gibraltar Museum [1997–ongoing (20)]. The first two excavations were toward the front of the cave and the most recent toward the rear. Radiocarbon dates have been obtained from all excavations. Those from Waechter's excavation were measured conventionally and removed from a section in 1957, long after the excavation had ceased and should be viewed with caution (21).

Eighteen samples of charcoal and two burned bones have been dated from the NHM excavation. All charcoal fragments were treated with the gentle RR protocol at the Oxford Radiocarbon Accelerator Unit (ORAU) (Table S6), with the exception of OxA-6075 from context 4d/22, which was pretreated with the ABA protocol. Evidence of occupation is exceptionally scarce within the layers containing the purported final Middle Paleolithic (contexts 11–24) (22). When first described, this sample was considered largely undiagnostic, poorly associated with the dated charcoal, and potentially mixed, containing a rejuvenation flake from a prismatic core and Levallois flake (19, 22). Dates from this context, of around 30 ka BP can therefore only provide a *terminus ante quem* for the abundant Mousterian assemblages in level 18 and level 19, which both contain charcoal dated beyond 40 ka BP, as first suggested by Pettitt and Bailey (21). The most recent excavations have been dated with radiocarbon on 22 charcoal samples treated with an ABA protocol (20). These samples place the final Mousterian between 32–24 ka BP (ca. 36–29 ka calBP), although Finlayson et al. (20) suggest a minimum age of 28 or 24 ka BP (ca. 32 or ca. 29 ka calBP). Zilhão and Pettitt (23) doubt the reliability of the Finlayson et al. (20) dates, questioning both the ability of the pretreatment to remove contamination and the association of the charcoal fragments with the small assemblage of lithics.

We attempted to date modified bone from both the NHM and Gibraltar Museum excavations. Of 49 cut-marked bones screened, none contained sufficient nitrogen to attempt a date.

### %N Screening Results

The %N contents of all bones screened in this study are presented in Table S1. These results are compared with %N contents of bones from northern Iberia, obtained using identical methods, in Fig S2. Preservation of collagen is significantly worse south of the proposed Ebro frontier, most likely because of higher temperatures.

### Published Radiometric Dates from Jarama VI and Zafarraya

Both Jarama VI and Zafarraya have been dated before this study (Table S2). Bones from Zafarraya dated by Michel et al. (26, 27) were screened for nitrogen as part of this study (Table S3). The results closely match the carbon and nitrogen stable isotope and elemental data of collagen obtained by the ORAU at the time of

dating. Collagen samples that did not meet the criteria set by Van Klinken et al. (47) also did not contain sufficient nitrogen to suggest success by dating using the ultrafiltration protocol. These dates should therefore be viewed with caution.

### Critique of Dates from Middle Paleolithic/ Neanderthal Assemblages Thought to Be <42 k cal BP in Southern Iberia

See Table S4 for a critique of dates from Middle Paleolithic/Neanderthal assemblages thought to be <42 k cal BP in southern Iberia.

### Critique of Dates from Radiometrically Dated Evolved Aurignacian Assemblages in Southern Iberia

See Table S5 for a critique of dates from radiometrically dated Evolved Aurignacian assemblages in southern Iberia.

### SI Methods

All bone samples were screened for nitrogen content before radiocarbon dating. The majority of nitrogen in bone is contained within collagen, the fraction selected for radiocarbon dating, and so can provide an indication of whether a bone can be dated. When collagen constitutes less than 1 wt% of the bone, quality assurance indicators, such as the C:N ratio, %C, and  $\delta^{13}\text{C}$  often suggest that the protein is of poor quality (either being degraded or contaminated) and not suitable for dating (47). Brock et al. (24, 48) have shown that when bone contains more than 0.8% nitrogen, more than 1% collagen could be extracted with the ultrafiltration protocol in around 70% of cases. The method is minimally destructive requiring 5 mg of bone powder obtained with a dentist's drill after removal of the bone surface. The sample is loaded into a tin capsule and the amount of nitrogen remaining measured in an automated carbon and nitrogen analyzer (e.g., Carlo Erba NA 2000) coupled to a continuous flow-isotope ratio mass spectrometer (CF-IRMS) (e.g., Sercon 20/20) (24, 48).

The use of an ultrafilter to remove the smallest contaminants from bone collagen was first suggested in 1988 (49). When applied to bone of Paleolithic-age, the process often produces ages that are significantly older than collagen extracted and purified with other procedures (50, 51). This increase in age suggests improved removal of contaminants because young contamination has a much larger effect on the measured age than ancient contaminants containing no  $^{14}\text{C}$  (ca. 80  $^{14}\text{C}$  years for ancient vs. ca. 13000  $^{14}\text{C}$  years for 1% modern contamination added to a sample of 50000 BP).

Radiocarbon dating followed the methods described in Brock et al. (48). Bones were treated with the ultrafiltration protocol, denoted by the laboratory code AF. After sequential washing in HCl to remove the mineral phase, NaOH to remove base soluble organic components and HCl to remove secondary carbonates, the collagen was gelatinized. Large insoluble contaminants were then removed from the soluble gelatin with a 45- to 90- $\mu\text{m}$  Eeze filter before ultrafiltration with a Vivaspin 15 30-kDa MWCO ultrafilter to remove the smallest contaminants. The residue was then freeze-dried. As a precautionary measure, if it was possible that glues or consolidants had been applied to the bone, a sequence of methanol, acetone, and chloroform washes were applied before pretreatment.

Collagen was combusted in an automated carbon and nitrogen analyzer coupled to a CF-IRMS as described for %N measurement, allowing measurement of carbon and nitrogen abundance and stable isotopes. The remaining gas was collected cryogenically for conversion to graphite using an iron catalyst (52) and radiocarbon dated by accelerator mass spectrometry (53).

Dates have been calculated according to the conventions of Stuiver and Polach (53, 54) and corrected for pretreatment and combustion backgrounds (55). Samples are defined as infinite when the  $F^{14}\text{C}$  is less than twice its error from 0 and thus indistinguishable from background (54). The infinite date is equivalent to twice the size of the error. For example, if a sample has an  $F^{14}\text{C}$  of  $0.0022 \pm 0.0012$  (equivalent to  $49200 \pm 4,400$  BP),

it is regarded as infinite and ascribed a date of  $0.0024 \text{ F}^{14}\text{C}$  or  $>48500 \text{ BP}$ . In terms of the conventional ages that are presented here, any dates with an error of  $4,000 \text{ }^{14}\text{C}$  years or greater are considered infinite.

- Villaverde V, Roman D, Martínez-Valle R (2008) Excavaciones en la Cova de les Cendres (Teulada-Moraira): Campaña del 2007 [Excavations the Cova de les Cendres (Teulada-Moraira): 2007 Season]. *Sagvntvm Papeles del laboratorio de arqueología de Valencia* 39:169–175, Spanish.
- Villaverde Bonilla V, Martí Oliver B (1984) in *Paleolithic i Epipaleolithic: les Societats Caçadores de la prehistòria Valenciana [Palaeolithic and Epipaleolithic: the hunter societies of prehistoric Valencia]* (Servei d'Investigació prehistòrica, diputació de València, València), Valencian.
- Fortea PJ, Jorda Cerde F (1976) La Cueva de les Mallaetes y los Problemas del Paleolítico Superior del Mediterraneo Espanol. *Zephyrus* 26:129–166.
- Almagro Gorbea M (1971) La Cueva del Niño (Albacete) y la Cueva de la Griega (Segovia). *Trabajos de Prehistoria* 28(1):9–62.
- Higgs ES, Davidson I, Bernaldo De Quirós F (1976) Excavaciones en la Cueva del Niño, Ayna (Albacete). *Noticario Arqueológico Hispánico* 5:91–96.
- Davidson I (1981) Late Palaeolithic economy in eastern Spain. Unpublished PhD thesis, Faculty of Archaeology and Anthropology (Cambridge Univ, Cambridge), Chapter 10.
- Davidson I (1986) *Stone Age Prehistory*, eds Bailey GN, Callow P (Cambridge Univ Press, Cambridge), pp 95–118.
- Villaverde V, Eixea A, Zilhão J (2008) Aproximación a la industria lítica del Abrigo de la Quebrada (Chelva, Valencia). *Treballs d'Arqueologia* 14:213–228.
- Walker MJ, et al. (2008) Late neandertals in southeastern Iberia: Sima de las Palomas del Cabezo Gordo, Murcia, Spain. *Proc Natl Acad Sci USA* 105(52):20631–20636.
- Walker MJ, et al. (2011) The excavation of buried articulated Neanderthal skeletons at Sima de las Palomas (Murcia, SE Spain). *Quat Int* 259(9):7–21.
- Galván Santos B, et al. (2001) in *De Neandertales a Cromañones: El inicio del poblamiento humano en las tierras Valencianas [From Neanderthals to Cro-Magnons: The Beginning of Human Settlement in the Valencian Region]*, ed Villaverde Bonilla V (Universitat de Valencia, Valencia), pp 397–402. Spanish.
- Gómez De La Rúa D, Mallol C, Galván B, Hernández CM (2010) Una visión geoarqueológica del yacimiento musteriense de El Salt (Alcoy, Alicante) a partir de la micromorfología de suelos. *Recerques del Museu d'Alcoi* 19:19–32.
- Machado J, Hernández CM, Galván B (2011) Contribución teórico-metodológica al análisis histórico de palimpsestos arqueológicos a partir de la producción lítica. Un ejemplo de aplicación para el Paleolítico medio en el yacimiento de El Salt (Alcoy, Alicante). *Recerques del Museu d'Alcoi* 20:33–46.
- Marrero E, Hernández CM, Galván B (2011) El análisis espacial en el estudio de las secuencias de facies arqueosedimentarias. Criterios para identificar eventos de ocupación en yacimientos del Paleolítico Medio: El Salt y el Abric del Pastor (Alcoy, Alicante, España). *Recerques del Museu d'Alcoi* 20:7–32.
- Cortés Sánchez M (2007) *Cueva Bajondillo (Torremolinos). Secuencia cronocultural y paleoambiental del Cuaternario reciente en la Bahía de Málaga [Cueva Bajondillo (Torremolinos). Chronocultural and paleoenvironmental sequence of the recent Quaternary in the Bay of Malaga]*. (Servicio de publicaciones centro de ediciones de la diputación de Málaga, Málaga), Spanish.
- Jordá Pardo JF, Aura Tortosa JE (2006) *Miscelánea en homenaje a Victoria Cabrera [Miscellanea in tribute to Victoria Cabrera]*, eds Maillou JM, Baquedano E (Museo Arqueológico Regional, Alcalá de Henares), pp 578–597, Spanish.
- Waechter JD (1951) Excavations at Gorham's Cave, Gibraltar. *Proceedings of the Prehistoric Society* 17:83–92.
- Waechter JD (1964) The excavation of Gorham's Cave, Gibraltar, 1951–54. *Bulletin of the Institute of Archaeology* 4:189–221.
- Barton RNE (1999) Gibraltar Neanderthals and results of recent excavations in Gorham's, Vanguard and Ibeex Caves. *Antiquity* 73(279):13–23.
- Finlayson C, et al. (2006) Late survival of Neanderthals at the southernmost extreme of Europe. *Nature* 443(7113):850–853.
- Pettitt PB, Bailey RM (2000) *Neanderthals on the Edge*, eds Stringer CB, Barton RNE, Finlayson JC (Oxbow Books, Oxford), pp 155–162.
- Bronk Ramsey C, Higham TFG, Owen DC, Pike AWG, Hedges REM (2002) Radiocarbon dates from the Oxford AMS system: Archaeometry datelist 31. *Archaeometry* 44:1–150.
- Zilhão J, Pettitt P (2006) On the new dates for Gorham's Cave and the late survival of Iberian Neanderthals. *Before Farming*, 2006/3:article 3.
- Brock F, Higham T, Ramsey CB (2010) Pre-screening techniques for identification of samples suitable for radiocarbon dating of poorly preserved bones. *J Archaeol Sci* 37(4):855–865.
- Wood RE (2011) The contribution of new radiocarbon dating pretreatment techniques to understanding the Middle to Upper Palaeolithic transition in Iberia. Unpublished PhD thesis (Univ of Oxford, Oxford, United Kingdom).
- Jordá Pardo JF (2007) The wild river and the last Neanderthals: A palaeoflood in the geoarchaeological record of the Jarama Canyon (Central Range, Guadalajara province, Spain). *Geodin Acta* 20(4):209–217.
- Hublin J-J, Barroso-Ruiz C, Lara PM, Fontugne M, Reys J (1995) The Mousterian site of Zafarraya (Andalucía, Spain): Dating and implications on the Palaeolithic peopling processes of Western Europe. *C R Acad Sci II* 321(série IIa):931–937.
- Michel V, et al. (2003) in *El Pleistoceno Superior de la Cueva del Boquete de Zafarraya [The Late Pleistocene of the Cave of the Boquete de Zafarraya]*, ed Barroso-Ruiz C (Junta de Andalucía, Seville), pp 113–133. Spanish.
- Michel V, et al. (2006) in *La grotte du Boquete de Zafarraya, Málaga, Andalucía [The cave of the Boquete de Zafarraya, Malaga, Andalucía]* ed Barroso-Ruiz C (Junta de Andalucía, Seville), pp 487–518. French.
- Domènech E (2004) in *Actes du XIVème Congrès UISPP, Section 6, Le Paléolithique Supérieur [Acts of the 14th Congress UISPP, Section 6, the Upper Palaeolithic]*, ed Dewez M (Oxbow Books, Oxford), pp 1–4. French.
- Walker MJ, et al. (2008) Late neandertals in southeastern Iberia: Sima de las Palomas del Cabezo Gordo, Murcia, Spain. *Proc Natl Acad Sci USA* 105(52):20631–20636.
- Zilhão J, et al. (2010) Symbolic use of marine shells and mineral pigments by Iberian Neandertals. *Proc Natl Acad Sci USA* 107(3):1023–1028.
- Martínez Sánchez C (1997) El Yacimiento Musteriense de Cueva Antón (Mula, Murcia). *Memorias de Arqueología de la Región de Murcia* 6:18–47.
- Diez Fernández L, et al. (2008) El Paleolítico Medio en el Valle del Arlanza (Burgos). Los sitios de La Ermita, Millán y la Mina. *Cuaternario y Geomorfología* 22(3):135–157.
- Jennings RP, et al. (2009) New dates and palaeoenvironmental evidence for the Middle to Upper Palaeolithic occupation of Higueral de Valleja Cave, southern Spain. *Quat Sci Rev* 28(9–10):830–839.
- Fernández S, et al. (2007) The Holocene and Upper Pleistocene pollen sequence of Carhuela Cave, southern Spain. *Geobios* 40(1):75–90.
- Villaverde V, Aura JE, Barton CM (1998) The Upper Paleolithic in Mediterranean Spain: A review of current evidence. *J World Prehist* 12(2):121–198.
- Zilhão J, et al. (2010) Pego do Diabo (Loures, Portugal): Dating the emergence of anatomical modernity in westernmost Eurasia. *PLoS ONE* 5(1):e8880.
- Zilhão J, Cadoso JL, Pike AWG, Weninger B (2012) Gruta Nova da Columbeira (Bombarral, Portugal): Site stratigraphy, age of the Mousterian sequence, and implications for the timing of Neanderthal extinction in Iberia. *Quartär* 58:93–112.
- Hoffmann DL, Pike AWG, Wainer K, Zilhão J (2012) New U-series results for the pelegogenesis and the Palaeolithic archaeology of the Almonda karstic system (Torres Novas, Portugal). *Quat Int*, 10.1016/j.quaint.2012.05.027.
- Angelucci DE, Zilhão J (2009) Stratigraphy and formation processes of the upper pleistocene deposit at Gruta da Oliveira, Almonda karstic system, Torres Novas, Portugal. *Geoarchaeology* 24(3):277–310.
- Brugal JP, Raposo L (1999) Foz do Enxarrique (Ródão, Portugal): First results of the analysis of a bone assemblage from a Middle Palaeolithic open site, in The Role of Early Humans in the Accumulation of European Lower and Middle Paleolithic Bone Assemblages. *Monographien des Römisch-Germanischen Zentralmuseums* 42:367–379.
- Antunes MT, Cabral JMP, Cardoso JL, Pais J, Soares AM (1989) Paleolítico médio e superior em Portugal: Datas  $^{14}\text{C}$ , estado actual dos conhecimentos, síntese e discussão (Middle and Upper Palaeolithic in Portugal: Radiocarbon dates, state of knowledge, synthesis and discussion). *Ciências da Terra* 10:127–138.
- Zilhão J (2006) Chronostratigraphy of the Middle-to-Upper Paleolithic Transition in the Iberian Peninsula. *Pyrenae* 37(1):7–84.
- Raposo L, Cardoso JL (1998) *O Paleolítico Médio da Conceição (Alcochete) [The Middle Palaeolithic of Conceição (Alcochete)]*, (Lusoponte, Montijo), Portuguese.
- Zilhão J (2006) in *Miscelánea en homenaje a Victoria Cabrera [Miscellanea in Tribute to Victoria Cabrera]*, eds Maillou JM, Baquedano E (Museo Arqueológico Regional, Alcalá de Henares), pp 372–395, Spanish.
- Van Klinken GJ (1999) Bone collagen quality indicators for palaeodietary and radiocarbon measurements. *J Archaeol Sci* 26(6):687–695.
- Brock F, Higham T, Ditchfield P, Ramsey CB (2010) Current pretreatment methods for AMS radiocarbon dating at the Oxford Radiocarbon Accelerator Unit (ORAU). *Radiocarbon* 52(1):103–112.
- Brown TA, Nelson DE, Vogel JS, Southon JR (1998) Improved collagen extraction by modified Longin method. *Radiocarbon* 30(2):171–177.
- Higham T (2011) European Middle and Upper Palaeolithic radiocarbon dates are often older than they look: Problems with previous dates and some remedies. *Antiquity* 85(327):235–249.
- Higham TFG, Jacobi RM, Bronk Ramsey C (2006) Radiocarbon dating of ancient bone using ultrafiltration. *Radiocarbon* 48(2):179–195.
- Dee M, Bronk Ramsey C (2000) Refinement of graphite target production at ORAU. *Nucl Instrum Meth B* 172(1–4):449–453.
- Bronk Ramsey CB, Higham TFG, Leach P (2004) Towards high-precision AMS: Progress and limitations. *Radiocarbon* 46(1):17–24.
- Stuiver M, Polach HA (1977) Reporting of  $^{14}\text{C}$  Data. *Radiocarbon* 19(3):355–363.
- Wood RE, Higham TFG, Bronk Ramsey C (2010) Refining background corrections for radiocarbon dating of bone collagen at ORAU. *Radiocarbon* 52(2):600–611.
- Hedges REM, Law AL, Bronk CR, Housley RA (1989) The Oxford Accelerator Mass Spectrometry Facility: Technical developments in routine dating. *Archaeometry* 31(2):99–113.
- Longin R (1971) New method of collagen extraction for radiocarbon dating. *Nature* 230(5291):241–242.
- Tisnérat-Laborde N, Valladas H, Kaltnecker E, Arnold M (2003) AMS radiocarbon dating of bones at LSCE. *Radiocarbon* 45(3):409–419.



**Table S2. Published radiometric dates from Jarama VI and Zafarraya**

[Table S2](#)

<sup>14</sup>C denotes a conventionally measured radiocarbon date and AMS, a radiocarbon date measured by accelerator mass spectrometry. For laboratory pretreatment codes, please refer to [Table S6](#). EU refers to an Electron Spin Resonance or U-Series date that assumes early uptake of uranium and LU, linear uptake. U-Series Alpha refers to U-Series dates measured by  $\alpha$ -spectroscopy and TIMS, thermal ionization mass spectrometry.

**Table S3. The %N content of bones dated by Michel et al. (28, 29) and the quality assurance data of the dated collagen**

[Table S3](#)

All but one sample have isotopic or elemental data that suggest collagen was very degraded or contaminated, and low nitrogen contents. To obtain a reliable radiocarbon date, bone should contain >1% collagen,  $\delta^{13}\text{C}$  between  $-22\text{‰}$  and  $-18\text{‰}$ ,  $\delta^{15}\text{N}$  between 2‰ and 12 ‰, C:N 2.9–3.4 and % C >30% (55). Error on stable isotope values is typically  $\pm 0.2\text{‰}$  and %N measurement  $\pm 0.2\%$ , 2 standard deviations.

**Table S4. Critique of dates from Middle Paleolithic/Neanderthal assemblages thought to be <42 ka calBP in southern Iberia**

[Table S4](#)

All uncalibrated dates are given at 1 SD, and all calibrated date ranges at 95% probability. Errors for nonradiocarbon dates are given at 1 SD.

**Table S5. Critique of dates from radiometrically dated assemblages that are thought to be Aurignacian in southern Iberia**

[Table S5](#)

All uncalibrated dates are given at 1 SD, and all calibrated date ranges at 95% probability. Errors for nonradiocarbon dates are given at 1 SD.

**Table S6. Summary of radiocarbon pretreatment methods mentioned in the main text and *SI Text***

[Table S6](#)

Where a method is used at the ORAU (48, 56), the associated laboratory code is given.

\*Method no longer in use at the ORAU.
