# Supplementary material
Source: PubMed Central journal article supplement (PMC3581959)
Supplement: 1207656110_st06.pdf [file 1207656110_st06.pdf]

| ORAU Pretreatment code | Material | Generic name     | Reference | Description                                                                                                                                                                                                                                                                                        |
|------------------------|----------|------------------|-----------|----------------------------------------------------------------------------------------------------------------------------------------------------------------------------------------------------------------------------------------------------------------------------------------------------|
| AF                     | Bone     | Ultrafiltration  | 48        | Acid, base and acid washes are followed by gelatinisation of the insoluble residue and filtration and ultrafiltration of the gelatin.                                                                                                                                                              |
| AG*                    | Bone     |                  | 48        | Acid, base and acid washes are followed by gelatinisation of the insoluble residue and filtration of the gelatin.                                                                                                                                                                                  |
| AC*                    | Bone     |                  | 56        | Acid wash followed by hydrolysis of the insoluble residue and purification of the amino acids with activated charcoal and ion exchange chromatography                                                                                                                                              |
| RR*                    | Charcoal |                  | 48        | Acid wash, ultrasonication in ultrapure water and an acid wash.                                                                                                                                                                                                                                    |
| ZR                     | Charcoal | ABA              | 48        | Acid, base and acid washes.                                                                                                                                                                                                                                                                        |
| XR                     | Charcoal | ABOx-SC          | 48        | Acid and base washes are followed by chemical oxidation and partial combustion.                                                                                                                                                                                                                    |
| Not used that the ORAU | Bone     | Longin method    | 57        | Acid wash followed by gelatinisation of the insoluble residue and filtration of the gelatin to remove large insoluble materials.                                                                                                                                                                   |
| Not used that the ORAU | Bone     | Ninhydrin method | 58        | Ninhydrin is used to remove the carbon from the carboxylic acid group of amino acids. After demineralisation in acid, ninhydrin removes any free amino acids from the collagen. The protein is then hydrolysed and the carbon released from a subsequent ninhydrin treatment collected for dating. |
